# Supplementary material for: Functional ADAM12 Variants Modulate Proteolytic Activity and Influence Metabolic Traits
Source: Research Square preprint supplement (doi:10.21203/rs.3.rs-8138455/v1), 2025-12-01
Supplement: Supplementary file 1 [file 2ac2c46fbf5e4c69e1438b4f.docx]

Table S1: Replication-phase Linear Regression Analysis of K170R Variant.

| Trait | Confounders Adjustment | Unstandardized Coefficients | | Standardized Coefficients | t | Significance | 95.0% Confidence Interval for B | |
| --- | --- | --- | --- | --- | --- | --- | --- | --- |
| B | Std Error | Beta | Lower Bound | Upper Bound |
| HbA1c | Not adjusted | 0 | 0.006 | 0.001 | 0.023 | 0.982 | -0.011 | 0.011 |
| Adjusted for Age, sex | -0.002 | 0.006 | -0.012 | -0.302 | 0.763 | -0.014 | 0.010 |
| Adjusted for Age, sex,BMI | -0.002 | 0.006 | -0.013 | -0.328 | 0.743 | -0.014 | 0.010 |
| Ethnicity | 0 | 0.006 | -0.001 | -0.026 | 0.979 | -0.011 | 0.011 |
| LDL | Not adjusted | 0.004 | 0.010 | 0.014 | 0.379 | 0.705 | -0.015 | 0.023 |
| Adjusted for Age, sex | 0.003 | 0.010 | 0.011 | 0.286 | 0.775 | -0.016 | 0.022 |
| Adjusted for Age, sex,BMI | 0.002 | 0.010 | 0.006 | 0.156 | 0.876 | -0.018 | 0.021 |
| Ethnicity | 0.003 | 0.010 | 0.012 | 0.319 | 0.750 | -0.016 | 0.022 |
| TC | Not adjusted | 0.003 | 0.009 | 0.012 | 0.323 | 0.747 | -0.014 | 0.020 |
| Adjusted for Age, sex | 0.002 | 0.009 | 0.007 | 0.179 | 0.858 | -0.016 | 0.019 |
| Adjusted for Age, sex,BMI | 0.001 | 0.009 | 0.002 | 0.065 | 0.948 | -0.017 | 0.018 |
| Ethnicity | 0.003 | 0.009 | 0.012 | 0.316 | 0.752 | -0.014 | 0.020 |
| DBP | Not adjusted | 0 | 0.001 | -0.018 | -0.491 | 0.623 | -0.002 | 0.001 |
| Adjusted for Age, sex | 0 | 0.001 | -0.023 | -0.598 | 0.550 | -0.002 | 0.001 |
| Adjusted for Age, sex,BMI | -0.001 | 0.001 | -0.031 | -0.796 | 0.426 | -0.002 | 0.001 |
| Ethnicity | 0 | 0.001 | -0.015 | -0.411 | 0.681 | -0.002 | 0.001 |
| SBP | Not adjusted | 9.787x10-5 | 0 | 0.008 | 0.215 | 0.830 | -0.001 | 0.001 |
| Adjusted for Age, sex | -7.384x10-5 | 0.001 | -0.006 | -0.147 | 0.883 | -0.001 | 0.001 |
| Adjusted for Age, sex,BMI | 0 | 0.001 | -0.011 | -0.254 | 0.800 | -0.001 | 0.001 |
| Ethnicity | 0 | 0 | 0.010 | 0.258 | 0.797 | -0.001 | 0.001 |
| WC | Not adjusted | 0.001 | 0.001 | 0.049 | 1.293 | 0.196 | 0 | 0.002 |
| Adjusted for Age, sex | 0.001 | 0.001 | 0.037 | 0.929 | 0.353 | -0.001 | 0.002 |
| Adjusted for Age, sex,BMI | 0 | 0.001 | 0.018 | 0.273 | 0.785 | -0.002 | 0.003 |
| Ethnicity | 0.001 | 0.001 | 0.037 | 0.898 | 0.369 | -0.001 | 0.002 |
| BMI | Not adjusted | 0.003 | 0.001 | 0.065 | 1.893 | 0.059 | 0 | 0.005 |
| Adjusted for Age, sex | 0.002 | 0.001 | 0.049 | 1.361 | 0.174 | -0.001 | 0.005 |
| Ethnicity | 0.002 | 0.001 | 0.058 | 1.613 | 0.107 | -0.001 | 0.005 |
| Waist:Hip Ratio | Not adjusted | 0.099 | 0.120 | 0.031 | 0.823 | 0.411 | -0.137 | 0.335 |
| Adjusted for Age, sex | 0.075 | 0.124 | 0.026 | 0.602 | 0.548 | -0.169 | 0.318 |
| Adjusted for Age, sex,BMI | 0.038 | 0.128 | 0.013 | 0.296 | 0.767 | -0.213 | 0.288 |
| Ethnicity | 0.093 | 0.120 | 0.029 | 0.769 | 0.442 | -0.144 | 0.329 |
| FBG | Not adjusted | -0.002 | 0.004 | -0.022 | -0.577 | 0.564 | -0.009 | 0.005 |
| Adjusted for Age, sex | -0.004 | 0.004 | -0.039 | -0.992 | 0.321 | -0.011 | 0.004 |
| Adjusted for Age, sex,BMI | -0.004 | 0.004 | -0.045 | -1.121 | 0.263 | -0.012 | 0.003 |
| Ethnicity | -0.003 | 0.004 | -0.027 | -0.718 | 0.473 | -0.010 | 0.005 |
| TGL | Not adjusted | 0.001 | 0.010 | 0.004 | 0.103 | 0.918 | -0.018 | 0.020 |
| Adjusted for Age, sex | 0 | 0.010 | 0.002 | 0.044 | 0.965 | -0.019 | 0.020 |
| Adjusted for Age, sex,BMI | -0.002 | 0.010 | -0.006 | -0.164 | 0.870 | -0.021 | 0.018 |
| Ethnicity | 0 | 0.010 | 0.001 | 0.014 | 0.989 | -0.019 | 0.019 |
| HDL | Not adjusted | -0.007 | 0.026 | -0.011 | -0.280 | 0.780 | -0.058 | 0.043 |
| Adjusted for Age, sex | -0.013 | 0.028 | -0.019 | -0.473 | 0.636 | -0.067 | 0.041 |
| Adjusted for Age, sex,BMI | -0.007 | 0.029 | -0.010 | -0.251 | 0.802 | -0.063 | 0.049 |
| Ethnicity | 0 | 0.026 | -0.001 | -0.018 | 0.986 | -0.052 | 0.051 |

Table S2: Replication-phase Linear Regression Analysis of M662V Variant. Significant associations are shown in bold font (P< 0.05).

| Trait | Confounders Adjustment | Unstandardized Coefficients | | Standardized Coefficients | t | Significance | 95.0% Confidence Interval for B | |
| --- | --- | --- | --- | --- | --- | --- | --- | --- |
| B | Std Error | Beta | Lower Bound | Upper Bound |
| **DBP** | Not adjusted | -0.001 | 0.001 | -0.047 | -1.263 | 0.207 | -0.003 | 0.001 |
| Adjusted for Age, sex | -0.001 | 0.001 | -0.026 | -0.686 | 0.493 | -0.003 | 0.001 |
| Adjusted for Age, sex,BMI | 0 | 0.001 | -0.016 | -0.416 | 0.682 | -0.002 | 0.002 |
| Ethnicity | -0.002 | 0.001 | -0.068 | -1.898 | 0.058 | -0.004 | 0 |
| **SBP** | Not adjusted | 0 | 0.001 | -0.022 | -0.578 | 0.563 | -0.002 | 0.001 |
| Adjusted for Age, sex | 0 | 0.001 | 0.031 | 0.748 | 0.455 | -0.001 | 0.002 |
| Adjusted for Age, sex,BMI | 0.001 | 0.001 | 0.038 | 0.920 | 0.358 | -0.001 | 0.002 |
| Ethnicity | -0.001 | 0.001 | -0.032 | -0.902 | 0.367 | -0.002 | 0.001 |
| **HbA1c** | Not adjusted | -0.004 | 0.007 | -0.021 | -0.570 | 0.569 | -0.019 | 0.010 |
| Adjusted for Age, sex | 0.004 | 0.008 | 0.019 | 0.484 | 0.628 | -0.012 | 0.019 |
| Adjusted for Age, sex,BMI | 0.004 | 0.008 | 0.022 | 0.547 | 0.585 | -0.011 | 0.020 |
| Ethnicity | -0.002 | 0.007 | -0.009 | -0.247 | 0.805 | -0.016 | 0.012 |
| **BMI** | Not adjusted | -0.003 | 0.002 | -0.055 | -1.600 | 0.110 | -0.006 | 0.001 |
| Adjusted for Age, sex | **-0.004** | **0.002** | **-0.073** | **-2.058** | **0.040** | **-0.007** | **0** |
| Ethnicity | 0.002 | 0.002 | 0.041 | 1.184 | 0.237 | -0.001 | 0.005 |
| **Waist:Hip Ratio** | Not adjusted | 0.001 | 0.159 | 0 | 0.006 | 0.995 | -0.312 | 0.314 |
| Adjusted for Age, sex | **0.352** | **0.162** | **0.092** | **2.166** | **0.031** | **0.033** | **0.670** |
| Adjusted for Age, sex,BMI | **0.447** | **0.167** | **0.117** | **2.684** | **0.007** | **0.120** | **0.774** |
| Ethnicity | 0.067 | 0.152 | 0.016 | 0.440 | 0.660 | -0.232 | 0.366 |
| **FBG** | Not adjusted | 0.001 | 0.005 | 0.010 | 0.257 | 0.797 | -0.008 | 0.011 |
| Adjusted for Age, sex | 0.006 | 0.005 | 0.045 | 1.152 | 0.250 | -0.004 | 0.016 |
| Adjusted for Age, sex,BMI | 0.007 | 0.005 | 0.052 | 1.317 | 0.188 | -0.003 | 0.017 |
| Ethnicity | 0.006 | 0.005 | 0.045 | 1.240 | 0.215 | -0.003 | 0.015 |
| **TC** | Not adjusted | -0.003 | 0.012 | -0.011 | -0.300 | 0.765 | -0.026 | 0.019 |
| Adjusted for Age, sex | -0.002 | 0.012 | -0.006 | -0.164 | 0.870 | -0.025 | 0.021 |
| Adjusted for Age, sex,BMI | 0 | 0.012 | 0.001 | 0.029 | 0.977 | -0.023 | 0.023 |
| Ethnicity | -0.003 | 0.011 | -0.010 | -0.265 | 0.791 | -0.025 | 0.019 |
| **TGL** | Not adjusted | -0.014 | 0.013 | -0.043 | -1.136 | 0.256 | -0.039 | 0.010 |
| Adjusted for Age, sex | -0.005 | 0.013 | -0.016 | -0.416 | 0.678 | -0.030 | 0.020 |
| Adjusted for Age, sex,BMI | 0 | 0.013 | -0.001 | -0.025 | 0.980 | -0.026 | 0.025 |
| Ethnicity | -0.007 | 0.012 | -0.020 | -0.554 | 0.580 | -0.030 | 0.017 |
| **HDL** | Not adjusted | **0.134** | **0.034** | **0.146** | **3.933** | **0** | **0.067** | **0.200** |
| Adjusted for Age, sex | **0.108** | **0.036** | **0.118** | **2.953** | **0.003** | **0.036** | **0.179** |
| Adjusted for Age, sex,BMI | **0.098** | **0.038** | **0.107** | **2.601** | **0.009** | **0.024** | **0.172** |
| Ethnicity | **0.080** | **0.034** | **0.087** | **2.369** | **0.018** | **0.014** | **0.145** |
| **LDL** | Not adjusted | -0.021 | 0.013 | -0.063 | -1.679 | 0.094 | -0.046 | 0.004 |
| Adjusted for Age, sex | -0.018 | 0.013 | -0.053 | -1.400 | 0.162 | -0.042 | 0.007 |
| Adjusted for Age, sex,BMI | -0.015 | 0.013 | -0.046 | -1.208 | 0.227 | -0.040 | 0.010 |
| Ethnicity | -0.016 | 0.012 | -0.048 | -1.341 | 0.180 | -0.040 | 0.008 |
| **TC:HDL** | Not adjusted | **-0.026** | **0.007** | **-0.133** | **-3.580** | **0** | **-0.040** | **-0.012** |
| Adjusted for Age, sex | -0.015 | 0.013 | -0.046 | -1.208 | 0.227 | -0.040 | 0.010 |
| Adjusted for Age, sex,BMI | -0.015 | 0.013 | -0.046 | -1.208 | 0.227 | -0.040 | 0.010 |
| Ethnicity | **-0.015** | **0.007** | **-0.080** | **-2.183** | **0.029** | **-0.029** | **-0.002** |

Table S3: Replication-phase Linear Regression Analysis of I908V Variant. Significant associations are shown in bold font (P< 0.05).

| Trait | Confounders Adjustment | Unstandardized Coefficients | | Standardized Coefficients | t | Significance | 95.0% Confidence Interval for B | |
| --- | --- | --- | --- | --- | --- | --- | --- | --- |
| B | Std Error | Beta | Lower Bound | Upper Bound |
| **HbA1c** | Not adjusted | **-0.010** | **0.005** | **-0.077** | **-2.057** | **0.040** | **-0.019** | **0** |
| Adjusted for Age, sex | -0.009 | 0.005 | -0.071 | -1.781 | 0.075 | -0.019 | 0.001 |
| Adjusted for Age, sex,BMI | -0.009 | 0.005 | -0.072 | -1.794 | 0.073 | -0.019 | 0.001 |
| Ethnicity | **-0.010** | **0.005** | **-0.083** | **-2.236** | **0.026** | **-0.020** | **-0.001** |
| **DBP** | Not adjusted | -0.001 | 0.001 | -0.032 | -0.847 | 0.397 | -0.002 | 0.001 |
| Adjusted for Age, sex | 0 | 0.001 | -0.022 | -0.583 | 0.560 | -0.002 | 0.001 |
| Adjusted for Age, sex,BMI | 0 | 0.001 | -0.027 | -0.698 | 0.485 | -0.002 | 0.001 |
| Ethnicity | 0 | 0.001 | -0.022 | -0.597 | 0.551 | -0.002 | 0.001 |
| **SBP** | Not adjusted | 0 | 0 | -0.041 | -1.084 | 0.279 | -0.001 | 0 |
| Adjusted for Age, sex | 0 | 0 | -0.026 | -0.636 | 0.525 | -0.001 | 0.001 |
| Adjusted for Age, sex,BMI | 0 | 0 | -0.029 | -0.698 | 0.485 | -0.001 | 0.001 |
| Ethnicity | 0 | 0 | -0.036 | -0.960 | 0.338 | -0.001 | 0 |
| **WC** | Not adjusted | 0 | 0.001 | 0.032 | 0.857 | 0.392 | -0.001 | 0.002 |
| Adjusted for Age, sex | 0.001 | 0.001 | 0.041 | 1.026 | 0.305 | -0.001 | 0.002 |
| Adjusted for Age, sex,BMI | 0.001 | 0.001 | 0.052 | 0.795 | 0.427 | -0.001 | 0.003 |
| Ethnicity | 0 | 0.001 | -0.025 | -0.609 | 0.543 | -0.002 | 0.001 |
| **BMI** | Not adjusted | 0.001 | 0.001 | 0.035 | 1.027 | 0.305 | -0.001 | 0.003 |
| Adjusted for Age, sex | 0.001 | 0.001 | 0.024 | 0.677 | 0.499 | -0.001 | 0.003 |
| Ethnicity | 0 | 0.001 | 0.015 | 0.416 | 0.678 | -0.002 | 0.003 |
| **Waist:Hip Ratio** | Not adjusted | -0.016 | 0.100 | -0.006 | -0.165 | 0.869 | -0.212 | 0.179 |
| Adjusted for Age, sex | -0.176 | 0.104 | -0.072 | -1.689 | 0.092 | -0.381 | 0.029 |
| Adjusted for Age, sex,BMI | -0.200 | 0.107 | -0.082 | -1.862 | 0.063 | -0.411 | 0.011 |
| Ethnicity | -0.035 | 0.099 | -0.013 | -0.355 | 0.723 | -0.230 | 0.159 |
| **FBG** | Not adjusted | **-0.007** | **0.003** | **-0.089** | **-2.383** | **0.017** | **-0.013** | **-0.001** |
| Adjusted for Age, sex | **-0.007** | **0.003** | **-0.089** | **-2.251** | **0.025** | **-0.013** | **-0.001** |
| Adjusted for Age, sex,BMI | **-0.007** | **0.003** | **-0.093** | **-2.330** | **0.020** | **-0.014** | **-0.001** |
| Ethnicity | **-0.009** | **0.003** | **-0.107** | **-2.864** | **0.004** | **-0.015** | **-0.003** |
| **TC** | Not adjusted | 0.006 | 0.007 | 0.033 | 0.886 | 0.376 | -0.008 | 0.021 |
| Adjusted for Age, sex | 0.006 | 0.007 | 0.033 | 0.886 | 0.376 | -0.008 | 0.021 |
| Adjusted for Age, sex,BMI | 0.006 | 0.007 | 0.032 | 0.835 | 0.404 | -0.008 | 0.021 |
| Ethnicity | 0.006 | 0.007 | 0.032 | 0.872 | 0.384 | -0.008 | 0.021 |
| **TGL** | Not adjusted | -0.004 | 0.008 | -0.020 | -0.543 | 0.588 | -0.020 | 0.011 |
| Adjusted for Age, sex | -0.002 | 0.008 | -0.007 | -0.187 | 0.852 | -0.018 | 0.015 |
| Adjusted for Age, sex,BMI | -0.002 | 0.008 | -0.012 | -0.296 | 0.768 | -0.019 | 0.014 |
| Ethnicity | -0.007 | 0.008 | -0.031 | -0.836 | 0.404 | -0.022 | 0.009 |
| **HDL** | Not adjusted | 0.016 | 0.022 | 0.028 | 0.755 | 0.451 | -0.026 | 0.059 |
| Adjusted for Age, sex | 0.001 | 0.023 | 0.001 | 0.031 | 0.975 | -0.045 | 0.047 |
| Adjusted for Age, sex,BMI | 0.004 | 0.024 | 0.007 | 0.169 | 0.866 | -0.043 | 0.051 |
| Ethnicity | 0.035 | 0.022 | 0.061 | 1.594 | 0.111 | -0.008 | 0.078 |
| **LDL** | Not adjusted | 0.008 | 0.008 | 0.037 | 0.972 | 0.331 | -0.008 | 0.024 |
| Adjusted for Age, sex | 0.009 | 0.008 | 0.041 | 1.091 | 0.275 | -0.007 | 0.025 |
| Adjusted for Age, sex,BMI | 0.008 | 0.008 | 0.039 | 1.032 | 0.303 | -0.008 | 0.024 |
| Ethnicity | 0.006 | 0.008 | 0.030 | 0.793 | 0.428 | -0.009 | 0.022 |
| **TC:HDL** | Not adjusted | 0.002 | 0.005 | 0.019 | 0.493 | 0.622 | -0.007 | 0.011 |
| Adjusted for Age, sex | 0.005 | 0.005 | 0.042 | 1.060 | 0.290 | -0.004 | 0.014 |
| Adjusted for Age, sex,BMI | 0.005 | 0.005 | 0.038 | 0.945 | 0.345 | -0.005 | 0.014 |
| Ethnicity | -0.001 | 0.005 | -0.008 | -0.215 | 0.830 | -0.010 | 0.008 |


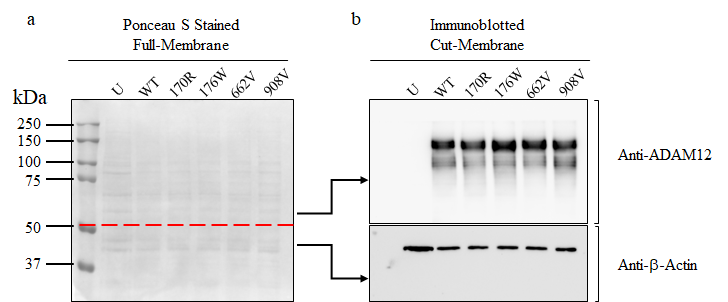


**Supplementary Figure S1:** The effect of ADAM12 variants on enzyme kinetic parameters.

Western blot analysis of ADAM12 variants (170R, 176W, 662V, 908V) using anti-ADAM12 and b-actin as a loading control. ADAM12-GFP tagged constructs of WT and variants were transfected in HEK293 cells. Control cells were transfected with empty vectors. Before blotting with antibodies, the nitrocellulose membrane was stained with Ponceau S stain to verify proteins transfer (a), then it was cut into two pieces according to the molecular weight marker (at the red dashed line) to enable blotting with anti-ADAM12 and anti-Actin antibodies separately (b).


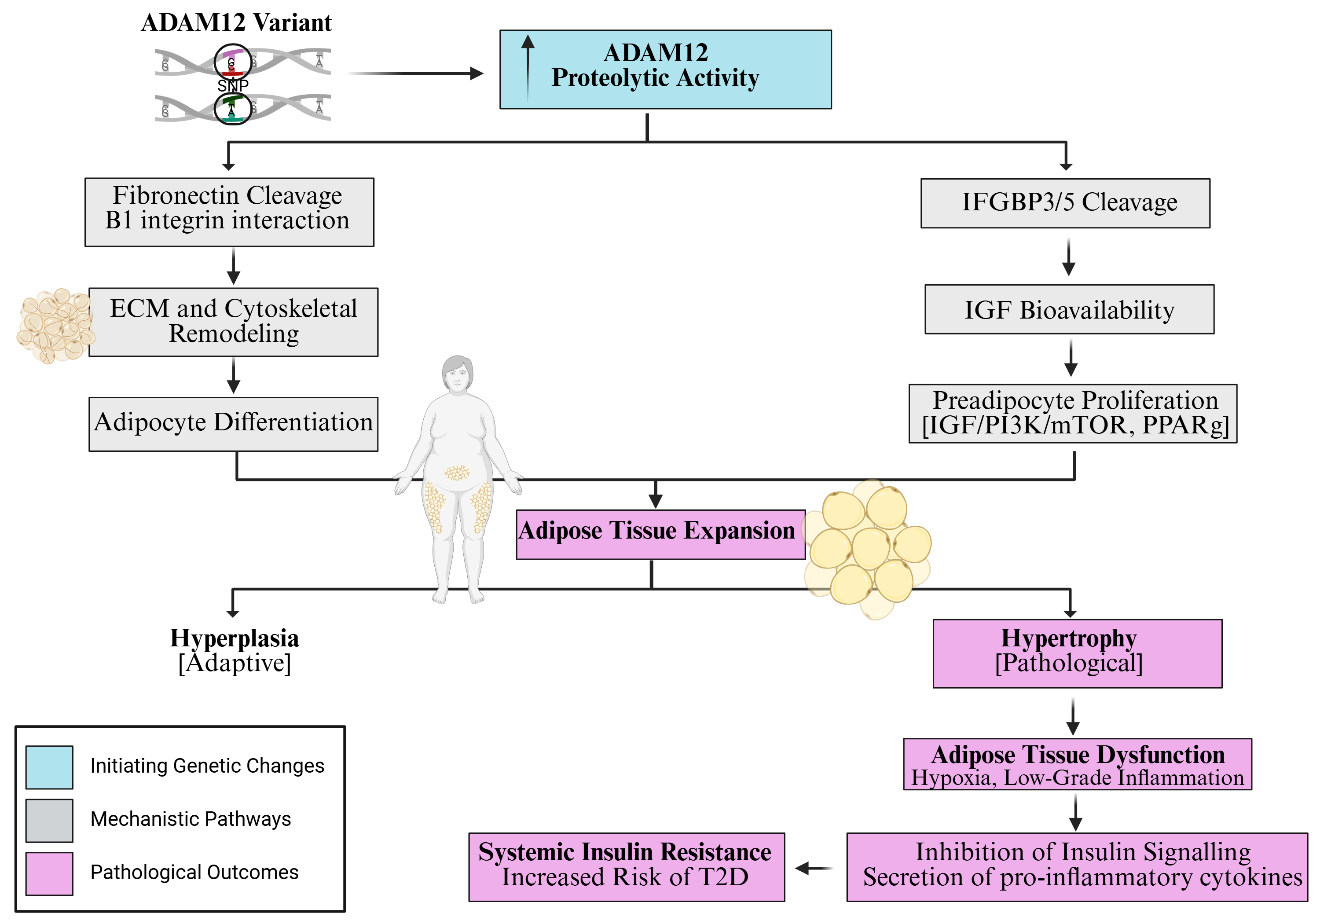


Figure S2:Proposed mechanism linking increased ADAM12 proteolytic activity to adipose tissue expansion and insulin resistance.

This diagram illustrates the proposed mechanism of metabolic dysregulation caused by increased *ADAM12* variant proteolytic activity. Increased ADAM12 proteolytic activity elevates IGF-binding proteins (IGFBP3, IGFBP5) cleavage, thus increasing the bioavailability of insulin-like growth factors (IGF-1/2). These in turn promote preadipocyte proliferation and adipose tissue hyperplasia through the activation of IGF/IGF1R/mTOR and PPARγ pathways. At the same time, increased ADAM12 proteolytic activity promotes cytoskeletal remodelling and extracellular matrix reorganization by ADAM12-mediated cleavage of fibronectin and its interaction with b1 integrins, aiding adipocyte differentiation. Although initially beneficial, the progressive expansion of white adipose tissue, results in adipocyte hypertrophy, tissue hypoxia, and localized chronic inflammation. Such a proinflammatory environment inhibits insulin signalling pathways, eventually causing systemic insulin resistance and elevated risk of T2D development.
