# Supplementary material for: Functional ADAM12 Variants Modulate Proteolytic Activity and Influence Metabolic Traits
Source: Research Square preprint supplement (doi:10.21203/rs.3.rs-8138455/v1), 2025-12-01
Supplement: Supplementary file 2 [file f2f23c1096e43dfb29709917.docx]

**Tables and Figures**

Table 1: Primers used for ADAM12 site-directed mutagenesis and its verification by sequencing

| **Gene-aa-**  **(base change)** | **SNP** | **Primer Name** | **Primer Sequence** |
| --- | --- | --- | --- |
| ADAM12-K170R  (T-C) | rs112264074  NP_003465.3:p.Lys170Arg | hADAM12-170-F | ATACAAA**CTTTTC**CCAGCGAGGAAGCTGAAAAGCGTCCGGG |
| hADAM12-170-R | CCCGGACGCTTTTCAGCTTCCTCGCTGGGAAAAGTTTGTAT |
| hADAM12-170-SeqF | ACGGAAACCCACTATCTGCA |
| hADAM12-170-SeqR | TTGCCTCTGAAACTCTCGGT |
| ADAM12-R176W  (G-A) | rs140497576  NP_003465.3:p.Arg176Trp | hADAM12-176-F | CGAAGAAGCTGAAAAGCGTCTGG**GGATCC**TGTGGATCACAT |
| hADAM12-176-R | ATGTGATCCACAGGATCCCCAGACGCTTTTCAGCTTCTTCG |
| ADAM12-176-Seq | Same as for rs112264074 |
| ADAM12-M662V  (T-C) | rs115100580  NP_003465.3:p.Met662Val | hADAM12-662-F | TTGGGGTTCACGAGTGT**GCAGTG**CAGTGCCACGGCAGAGGG |
| hADAM12-662-R | CCCTCTGCCGTGGCACTGCACTGCACACTCGTGAACCCCAA |
| hADAM12-662-SeqF | TCCAGTGTCAAGGAGGTGC |
| hADAM12-662-SeqR | ACAAATCCGGCAGCAAGAAG |
| ADAM12-I908V  (T-C) | rs41303603  NP_003465.3:p.Ile908Val | hADAM12-908-F | GATCCACCCACACCGCCTATGTTAAG**ACACGTA**CGCGGCCG |
| hADAM12-908-R | CGGCCGCGTACGTGTCTTAACATAGGCGGTGTGGGTGGATC |
| hADAM12-908-SeqF | CAGCCAAGCCTGCACTTAG |
| hADAM12-908-SeqR | CCGAAGTGGTAGAAGCCGTA |

Bold-underlined nucleotides represent restriction sites (either modified or not) to enable the identification of mutant plasmids. Only Bold font represents sites of mutagenesis.

Table 2: Demographic and clinical characteristics of healthy control and type 2 diabetic patients included in the discovery phase. All quantitative variables are represented as median and interquartiles (Q1, Q3), categorical values are presented n (%). p-values were calculated using the Wilcoxon rank-sum test for continuous variables and Pearson’s Chi-squared test for categorical variables.

| Criteria | Healthy Controls  (n=697) | Type 2 diabetics  (n=601) | p-value |
| --- | --- | --- | --- |
| Median (Q1,Q3) | Median (Q1,Q3) |
| Gender, n (%) |  |  | 0.7 |
| Male | 350 (50) | 308 (51) |
| Female | 347 (50) | 293 (49) |
| Age, years | 41 (31, 50) | 55 (47, 61) | <0.001 |
| Body Mass Index | 30 (25, 37) | 33 (29, 37) | <0.001 |
| Waist:hip Ratio | 0.58(0.51, 0.66) | 0.64 (0.58, 0.71) | <0.001 |
| FBGa, mmol/l | 5.1 (4.7, 5.7) | 10.2 (8.1, 12.8) | <0.001 |
| HbA1cb, % | 5.55 (5.20, 6.00) | 8.40 (7.30, 9.90) | <0.001 |
| Total cholesterol, mmol/l | 5.01 (4.36, 5.77) | 4.91 (4.21, 5.71) | 0.15 |
| Triglycerides, mmol/l | 1.24 (0.84, 1.91) | 1.57 (1.12, 2.28) | <0.001 |
| HDLc, mmol/l | 1.10 (0.90, 1.37) | 1.04 (0.85, 1.29) | 0.002 |
| LDLd, mmol/l | 3.26 (2.65, 3.91) | 3.00 (2.30, 3.72) | <0.001 |
| Total cholesterol :HDL ratio | 4.58 (3.49, 5.73) | 4.69 (3.58, 6.09) | 0.10 |
| SBPe, mmHg | 122 (112, 134) | 135 (123, 149) | <0.001 |
| DBPf, mmHg | 79 (70, 84) | 81 (74, 90) | <0.001 |
| aFBG: Fasting blood glucose; bHbA1c: Glycated hemoglobin; cHDL: High density lipoprotein; dLDL: Low density lipoprotein; eSBP: Systolic blood pressure; fDBP: Diastolic blood pressure. | | | |

Table 3: Missense *ADAM12* variants of significant associations with metabolic syndrome traits identified in the discovery study.

| **Variant ID** | **Allele Frequency** | | **Amino acid change** | **Traits associated with variant✝** | **β** | **P-Value** |
| --- | --- | --- | --- | --- | --- | --- |
| **GnomAd v2.1.1** | **This Study** |
| ADAM12-K170R  rs112264074  NP_003465.3:p.Lys170Arg | 0.001106 | 0.003436 | K170R | HbA1ca | 12.069 | 0.026 |
| HDLb | -1.369 | 0.039 |
| ADAM12-R176W  rs140497576  NP_003465.3:p.Arg176Trp | 0.000866 | 0.003436 | R176W | FBGc | 1.362 | 0.015 |
| HDL | -1.327 | 0.015 |
| ADAM12-M662V  rs115100580  NP_003465.3:p.Met662Val | 0.002337 | 0.006873 | M662V | DBPd | 2.512 | 0.023 |
| SBPe | 2.752 | 0.012 |
| ADAM12-I908V  rs41303603  NP_003465.3:p.Ile908Val | 0.02375 | 0.029 | I908V | FBG | -0.295 | 0.012 |
| HDL | 0.260 | 0.027 |
| LDLf | 0.360 | 0.004 |
| Non-HDL | 0.325 | 0.006 |
| TCg | 0.400 | 0.001 |
| aHbA1c: Glycated Haemoglobin; bHDL: High density lipoprotein; cFBG: Fasting blood glucose, dDBP: Diastolic blood pressure; eSBP: Systolic blood pressure; fLDL: Low density lipoprotein; gTC: total cholesterol | | | | | | |

Table 4: Demographics and clinical characteristics of healthy control and type 2 diabetic patients included in the replication study. All quantitative variables are represented as median and interquartiles (Q1, Q3), categorical values are presented n (%). p-values were calculated using the Wilcoxon rank-sum test for continuous variables and Pearson’s Chi-squared test for categorical variables.

| Criteria | Healthy Controls  (n=409) | Type 2 diabetics  (n=450) | p-value |
| --- | --- | --- | --- |
| Median (Q1,Q3) | Median (Q1,Q3) |
| Gender, n (%) |  |  | 0.014 |
| Male | 232 (56.7) | 292 (64.9) |
| Female | 177 (43.3) | 158 (35.1) |
| Age, years | 40 (32, 48) | 46 (38, 53) | <0.001 |
| Body Mass Index | 27.9 (24.6, 32.4) | 28.8 (25.9, 33.0) | 0.003 |
| Waist:Hip Ratio | 0.88 (0.83, 0.92) | 0.92 (0.88, 0.96) | <0.001 |
| FBGa, mmol/l | 4.70 (4.46, 5.00) | 5.80 (5.00, 7.30) | <0.001 |
| HbA1cb, % | 5.22 (4.70, 5.50) | 6.594±1.648 | <0.001 |
| Total cholesterol, mmol/l | 5.03 (4.35, 5.77) | 5.20 (4.60, 5.90) | 0.008 |
| Triglycerides, mmol/l | 1.16 (0.82, 1.60) | 1.50 (1.11, 2.10) | <0.001 |
| HDLc, mmol/l | 1.17 (1.00, 1.41) | 1.10 (0.90, 1.30) | <0.001 |
| LDLd, mmol/l | 3.28 (2.55, 3.81) | 3.35 (2.80, 4.00) | 0.002 |
| Total cholesterol:HDL ratio | 4.19 (3.32, 5.44) | 4.81 (3.96, 5.93) | <0.001 |
| SBPe, mmHg | 123 (111, 138) | 133 (120, 146) | <0.001 |
| DBPf, mmHg | 75 (69, 85) | 80 (73, 89) | <0.001 |
| aFBG: Fasting blood glucose; bHbA1c: Glycated hemoglobin; cHDL: High density lipoprotein; dLDL: Low density lipoprotein; eSBP: Systolic blood pressure; fDBP: Diastolic blood pressure. | | | |

Table 5: The association of *ADAM12* variants with metabolic biomarkers in the replication phase. Significant associations are shown in bold font (P< 0.05).

| Variant | Minor Allele frequency | Trait | Replication Phase Associations | | | | |
| --- | --- | --- | --- | --- | --- | --- | --- |
| Cohort | β | 95% CI | p-value | Bonferroni Significant |
| ADAM12-K170R  rs112264074 NP_003465.3:p.Lys170Arg | 0.031 | Waist:Hip Ratio | Complete | 0.099 | -0.137- 0.335 | 0.411 | No |
| Healthy Controls | -0.098 | -0.507 - 0.310 | 0.636 | No |
| Diabetic Patients | 0.324 | 0.009 - 0.638 | **0.044** | No |
| ADAM12-M662V  rs115100580  NP_003465.3:p.Met662Val | 0.044 | HDL | Complete | 0.134 | 0.067 - 0.200 | **0** | **Yes** |
| Healthy Controls | 0.143 | 0.032 - 0.0254 | **0.012** | No |
| Diabetic Patients | 0.105 | 0.019 - 0.191 | **0.017** | No |
| TC:HDL | Complete | -0.026 | -0.040 - -0.012 | **0** | **Yes** |
| Healthy Controls | -0.041 | -0.070 - -0.012 | **0.005** | No |
| Diabetic Patients | -0.015 | -0.030 - 0.001 | 0.073 | No |
| HbA1c | Complete | -0.004 | -0.019 - 0.010 | 0.569 | No |
| Healthy Controls | -0.081 | -0.160 - -0.002 | **0.044** | No |
| Diabetic Patients | 0.011 | -0.005 - 0.026 | 0.174 | No |
| ADAM12-I908  rs41303603  NP_003465.3:p.Ile908Val | 0.018 | FBG | Complete | -0.007 | -0.013 - -0.001 | **0.017** | No |
| Healthy Controls | -0.048 | -0.119 - 0.024 | 0.189 | No |
| Diabetic Patients | -0.006 | -0.012 - 0 | **0.044** | No |
| HbA1c | Complete | -0.010 | -0.019 - 0 | **0.040** | No |
| Healthy Controls | -0.007 | -0.057 - 0.044 | 0.794 | No |
| Diabetic Patients | -0.008 | -0.018 - 0.001 | 0.092 | No |
| LDL | Complete | 0.008 | -0.008 - 0.024 | 0.331 | No |
| Healthy Controls | -0.027 | -0.059 - 0.004 | 0.084 | No |
| Diabetic Patients | 0.029 | 0.011 - 0.046 | **0.001** | **Yes** |
| TC | Complete | 0.006 | -0.008 - 0.021 | 0.376 | No |
| Healthy Controls | -0.019 | -0.048 - 0.009 | 0.179 | No |
| Diabetic Patients | 0.022 | 0.006 - 0.038 | **0.006** | **Yes** |
